# Supplementary material
Source: PubMed Central journal article supplement (PMC3143359)

**Expression of mesenchyme-specific gene signatures by follicular dendritic cells: insights from the meta-analysis of microarray data from multiple mouse cell populations**

Neil A. Mabbott, J. Kenneth Baillie, Atshushi Kobayashi, David S. Donaldson, Hitoshi Ohmori, Sunny Yoon, Arnold S. Freedman, Tom C. Freeman, Kim M. Summers

**Supplementary Fig. 1:** The average expression profile of the top 50 clusters over the 85 samples used in our analysis. (Pearson  $r = 0.85$ , MCL = 2.2). Samples are grouped according to cell type: **1**, mesenchyme-lineage cells, embryonic stem cells, neurones; **2**, bone marrow progenitor cells; **3**, splenic classical DC and plasmacytoid DC; **4**, phagocytes (bone marrow-derived, peritoneal, RAW-264, osteoclasts, microglia); **5**, granulocytes, NK cells and mast cells; **6**, B and T lymphocytes; **7**, tissues (bone marrow, spleen and lymph nodes); **8**, FDC.

Cluster number

1

2

3

4

5

6

7

8

9

10

Mean cluster gene expression

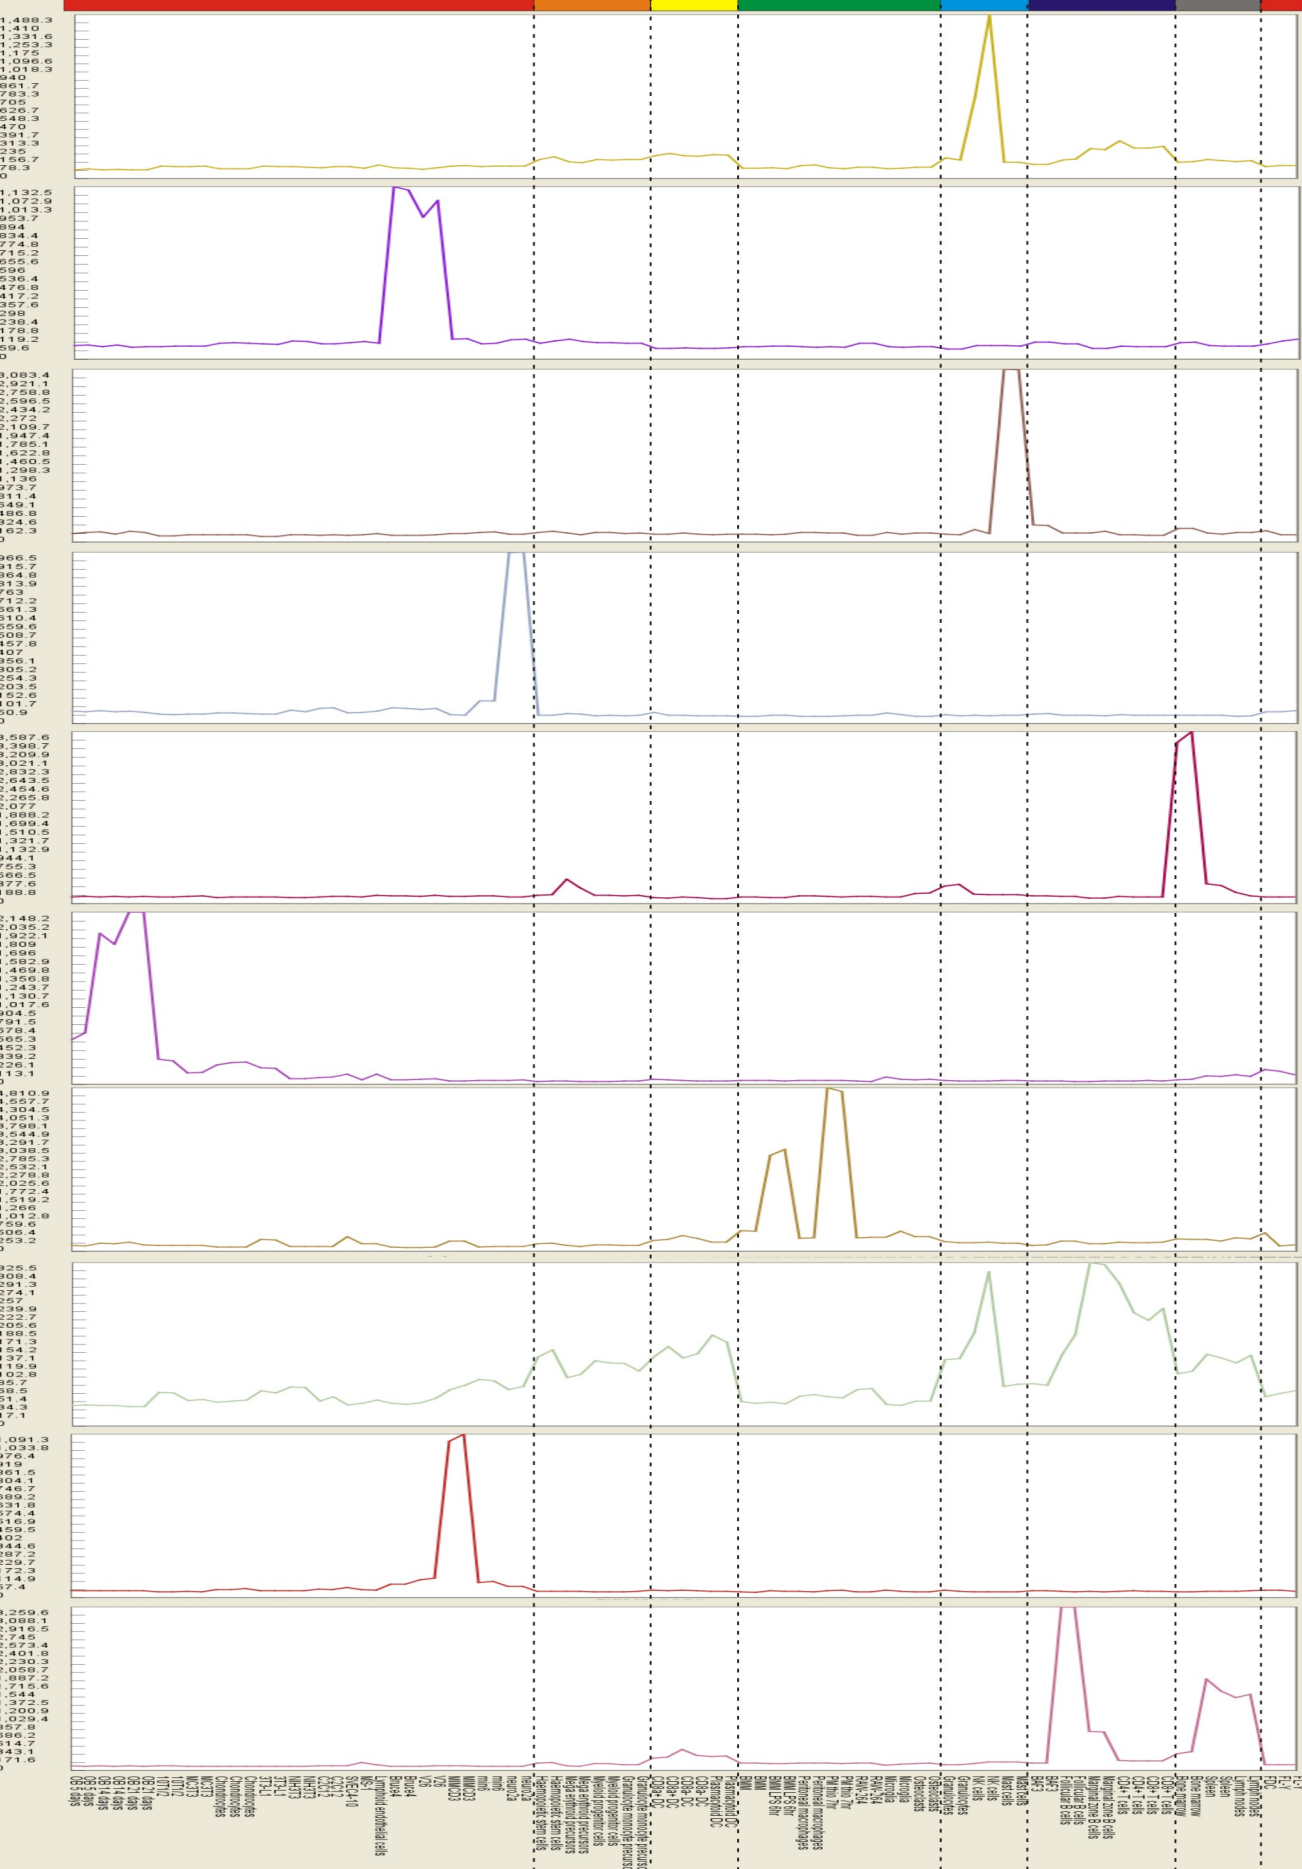

1

2

3

4

5

6

7

8

Cell type

OES1 cells  
 OES2 cells  
 OES3 cells  
 OES4 cells  
 OES5 cells  
 OES6 cells  
 OES7 cells  
 OES8 cells  
 OES9 cells  
 OES10 cells  
 OES11 cells  
 OES12 cells  
 OES13 cells  
 OES14 cells  
 OES15 cells  
 OES16 cells  
 OES17 cells  
 OES18 cells  
 OES19 cells  
 OES20 cells  
 OES21 cells  
 OES22 cells  
 OES23 cells  
 OES24 cells  
 OES25 cells  
 OES26 cells  
 OES27 cells  
 OES28 cells  
 OES29 cells  
 OES30 cells  
 OES31 cells  
 OES32 cells  
 OES33 cells  
 OES34 cells  
 OES35 cells  
 OES36 cells  
 OES37 cells  
 OES38 cells  
 OES39 cells  
 OES40 cells  
 OES41 cells  
 OES42 cells  
 OES43 cells  
 OES44 cells  
 OES45 cells  
 OES46 cells  
 OES47 cells  
 OES48 cells  
 OES49 cells  
 OES50 cells  
 OES51 cells  
 OES52 cells  
 OES53 cells  
 OES54 cells  
 OES55 cells  
 OES56 cells  
 OES57 cells  
 OES58 cells  
 OES59 cells  
 OES60 cells  
 OES61 cells  
 OES62 cells  
 OES63 cells  
 OES64 cells  
 OES65 cells  
 OES66 cells  
 OES67 cells  
 OES68 cells  
 OES69 cells  
 OES70 cells  
 OES71 cells  
 OES72 cells  
 OES73 cells  
 OES74 cells  
 OES75 cells  
 OES76 cells  
 OES77 cells  
 OES78 cells  
 OES79 cells  
 OES80 cells  
 OES81 cells  
 OES82 cells  
 OES83 cells  
 OES84 cells  
 OES85 cells  
 OES86 cells  
 OES87 cells  
 OES88 cells  
 OES89 cells  
 OES90 cells  
 OES91 cells  
 OES92 cells  
 OES93 cells  
 OES94 cells  
 OES95 cells  
 OES96 cells  
 OES97 cells  
 OES98 cells  
 OES99 cells  
 OES100 cells

Cluster number

11

12

13

14

15

16

17

18

19

20

Mean cluster gene expression

1,488.3  
1,410  
1,331.6  
1,253.3  
1,175  
1,096.6  
1,018.3  
940  
861.7  
783.3  
705  
626.7  
548.3  
470  
391.7  
313.3  
235  
156.7  
78.3  
0

715  
639.7  
562.1  
484.5  
406.9  
329.3  
251.7  
174.1  
96.5  
19.0

788.4  
712  
635.8  
559.3  
482.8  
406.3  
329.8  
253.3  
176.8  
100.3  
22.8

1,383.3  
1,310.5  
1,237.7  
1,164.9  
1,092.1  
1,019.3  
946.5  
873.7  
800.9  
728.1  
655.3  
582.5  
509.7  
436.8  
364  
291.2  
218.4  
145.6  
72.8  
0

16,768.1  
15,885.6  
15,003  
14,120.5  
13,238  
12,355.5  
11,473  
10,590.4  
9,707.8  
8,825.3  
7,942.8  
7,060.3  
6,177.8  
5,295.3  
4,412.8  
3,530.3  
2,647.8  
1,765.3  
882.5  
0

2,307  
2,185.6  
2,064  
1,942.4  
1,821  
1,699.6  
1,578  
1,456.4  
1,335  
1,213.6  
1,092.2  
971  
850  
728.4  
607.1  
485.7  
364.3  
242.8  
121.4  
0

1,432.9  
1,348  
1,263  
1,179  
1,095  
1,011  
927  
843  
759  
674  
590  
506  
422  
338  
254  
170  
86  
0

1,400.4  
1,326.7  
1,253  
1,179  
1,105  
1,031  
956.2  
884.5  
810.8  
737.1  
663.3  
589.6  
515.9  
442.2  
368.6  
294.9  
221.1  
147.4  
73.7  
0

877.6  
811.4  
745.2  
679  
612.8  
546.6  
480.4  
414.2  
348  
281.8  
215.6  
149.4  
83.2  
17  
0

429.8  
407.2  
384.6  
361.8  
339.3  
316.7  
294.1  
271.4  
248.8  
226.2  
203.6  
181  
158.3  
135.7  
113.1  
90.5  
67.9  
45.3  
22.7  
0

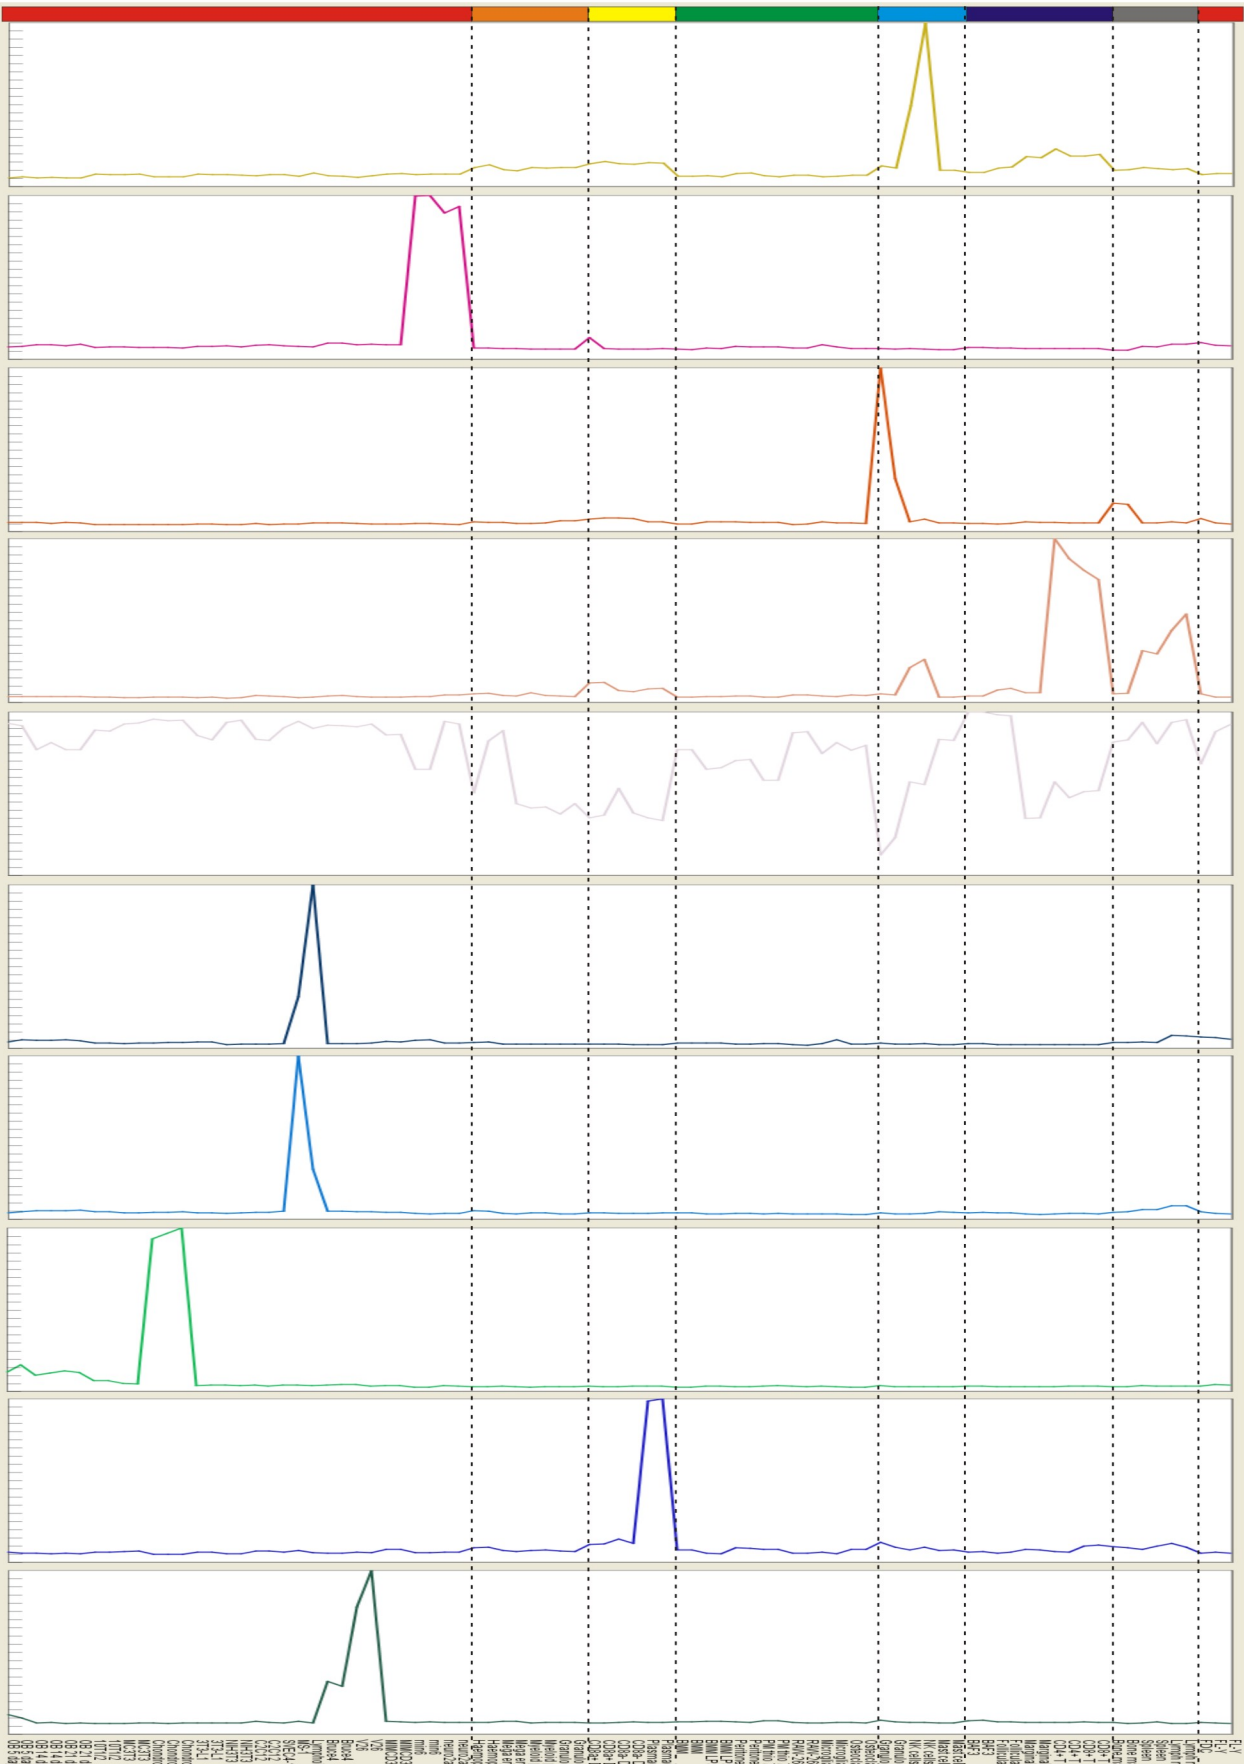

Cell type

1

2

3

4

5

6

7

8

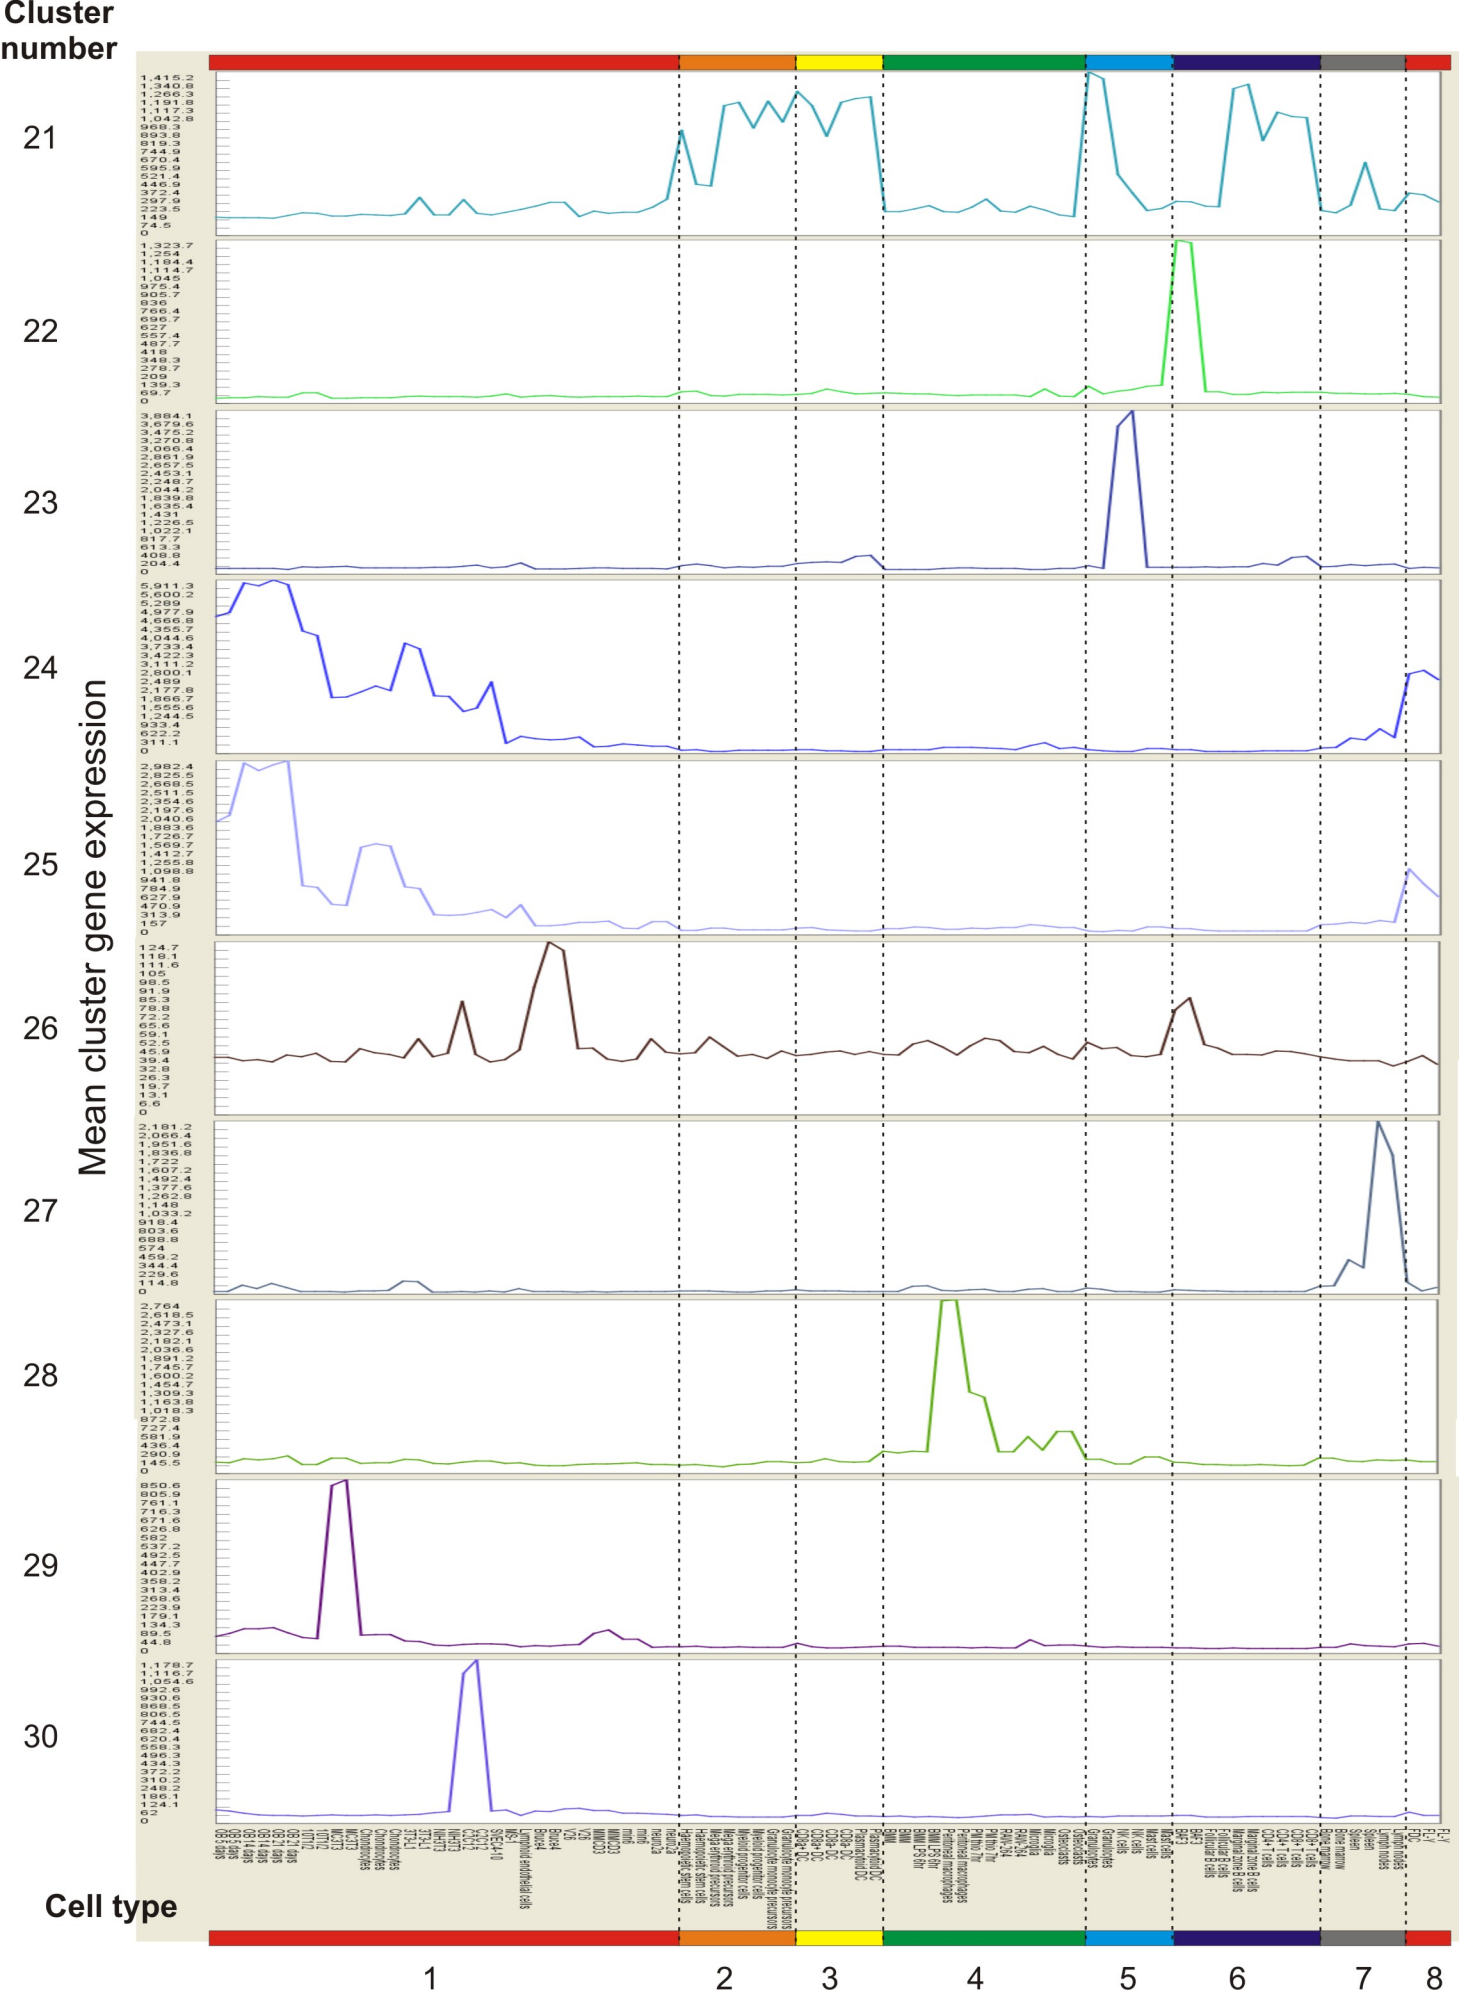

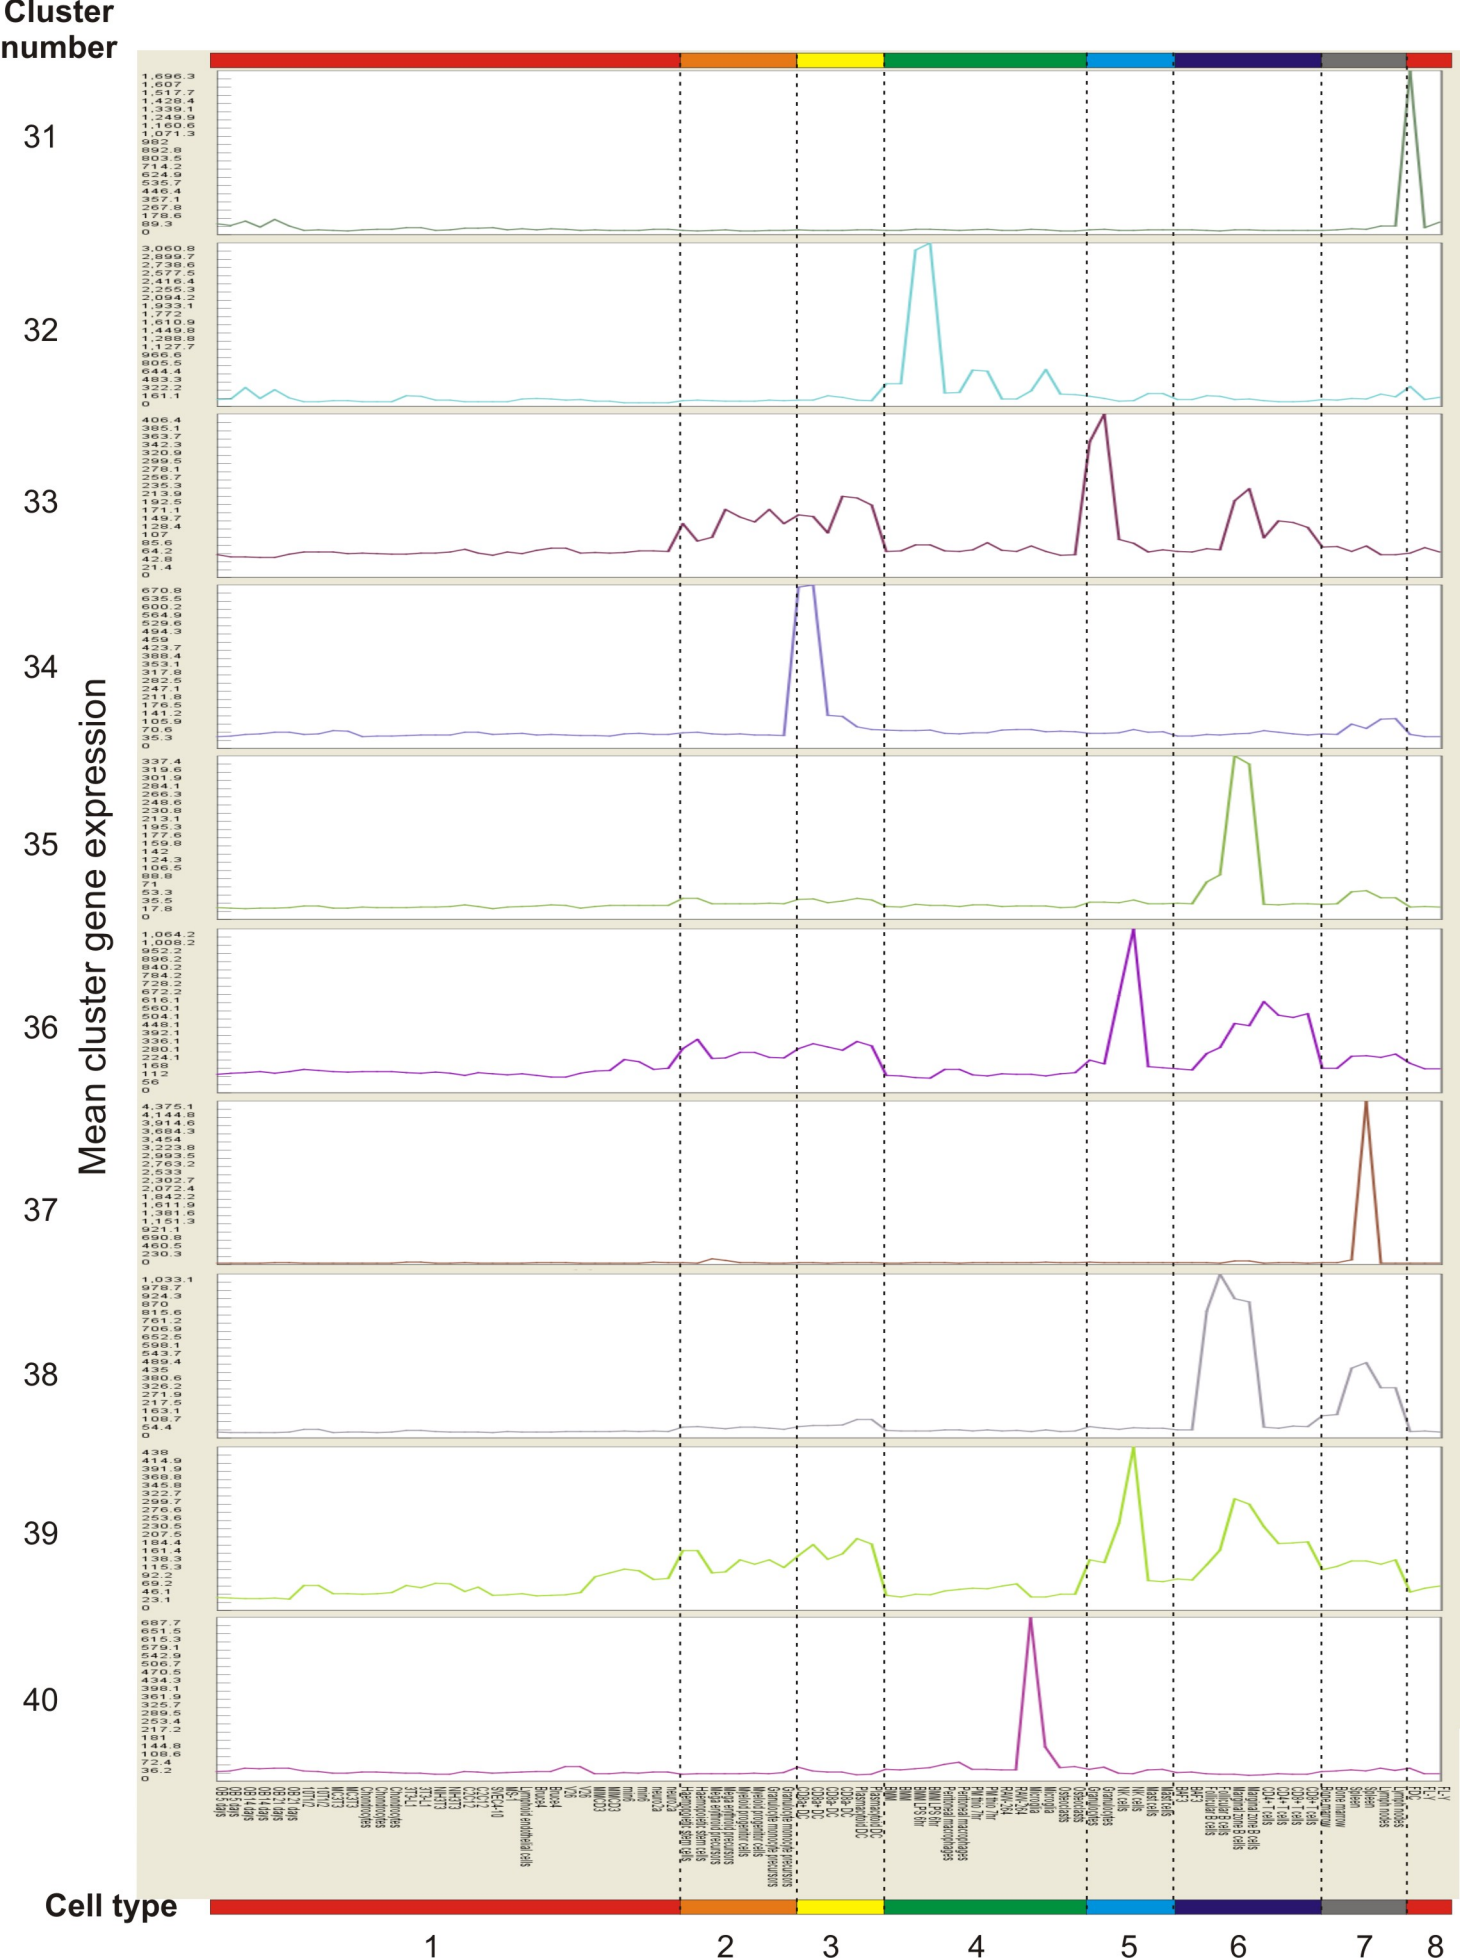

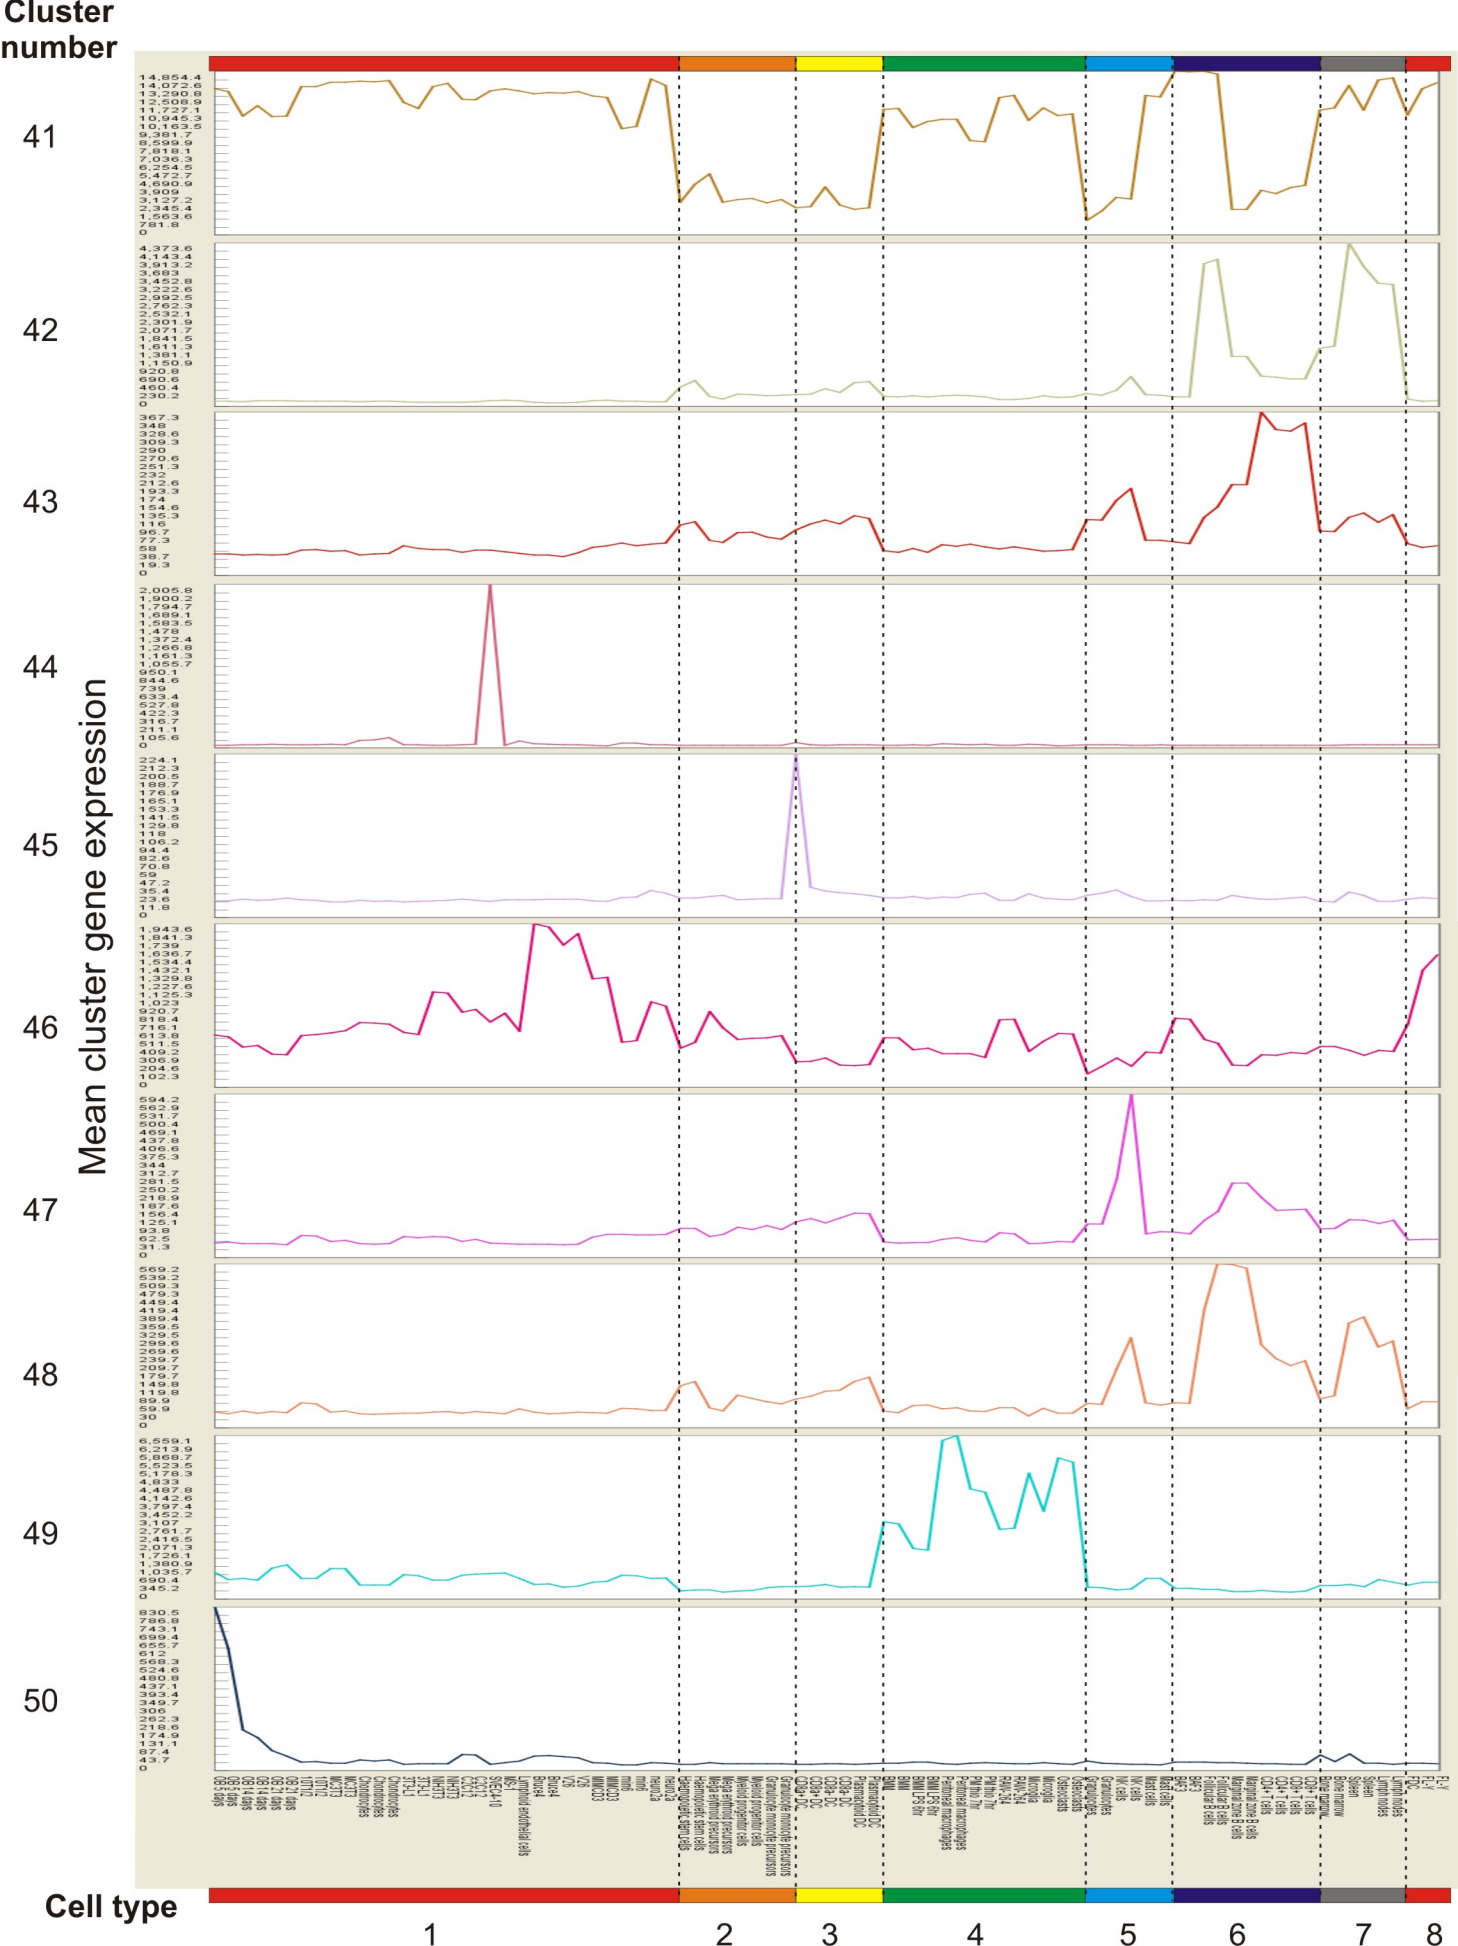

Supplement: imm0133-0482-SD1.pdf [file imm0133-0482-SD1.pdf]
