# Supplementary material
Source: PubMed Central journal article supplement (PMC3143359)
Supplement: imm0133-0482-SD3.pdf [file imm0133-0482-SD3.pdf]

**Supplementary Table 2:** Mesenchyme-specific cluster genes in the top 5% co-expressed by enriched splenic FDC versus FDC-depleted splenocytes in the study described by Huber *et al.* (2005)

| <b>Annotated genes from mesenchyme-specific clusters 24, 25, 92, 93 and 112</b> |                                                                                                |                                                  |
|---------------------------------------------------------------------------------|------------------------------------------------------------------------------------------------|--------------------------------------------------|
| <b>Gene symbol</b>                                                              | <b>Gene title</b>                                                                              | <b>In top 5% genes expressed by splenic FDC*</b> |
| <b>Acta2</b>                                                                    | <b>actin, alpha 2, smooth muscle, aorta</b>                                                    | <b>yes</b>                                       |
| Adamts12                                                                        | a disintegrin-like and metallopeptidase (reprolysin type) with thrombospondin type 1 motif, 12 | no                                               |
| Ak1                                                                             | adenylate kinase 1                                                                             | no                                               |
| Atoh8                                                                           | atonal homolog 8 (Drosophila)                                                                  | no                                               |
| <b>Bgn</b>                                                                      | <b>biglycan</b>                                                                                | <b>yes</b>                                       |
| Boc                                                                             | biregional cell adhesion molecule-related/down-regulated by oncogenes (Cdon) binding protein   | no                                               |
| C1qtnf6                                                                         | C1q and tumor necrosis factor related protein 6                                                | no                                               |
| <b>Cald1</b>                                                                    | <b>caldesmon 1</b>                                                                             | <b>yes</b>                                       |
| Casp12                                                                          | caspase 12                                                                                     | no                                               |
| <b>Ccdc80</b>                                                                   | <b>coiled-coil domain containing 80</b>                                                        | <b>yes</b>                                       |
| Ckap4                                                                           | cytoskeleton-associated protein 4                                                              | no                                               |
| Cnn3                                                                            | calponin 3, acidic                                                                             | <b>yes</b>                                       |
| Col12a1                                                                         | procollagen, type XII, alpha 1                                                                 | no                                               |
| <b>Col1a1</b>                                                                   | <b>procollagen, type I, alpha 1</b>                                                            | <b>yes</b>                                       |
| <b>Col1a2</b>                                                                   | <b>procollagen, type I, alpha 2</b>                                                            | <b>yes</b>                                       |
| <b>Col3a1</b>                                                                   | <b>procollagen, type III, alpha 1</b>                                                          | <b>yes</b>                                       |
| <b>Col5a2</b>                                                                   | <b>procollagen, type V, alpha 2</b>                                                            | <b>yes</b>                                       |
| Col6a1                                                                          | procollagen, type VI, alpha 1                                                                  | no                                               |
| Col6a2                                                                          | procollagen, type VI, alpha 2                                                                  | no                                               |
| <b>Crtap</b>                                                                    | <b>cartilage associated protein</b>                                                            | <b>yes</b>                                       |
| Cthrc1                                                                          | collagen triple helix repeat containing 1                                                      | no                                               |
| <b>Cx3cl1</b>                                                                   | <b>chemokine (C-X3-C motif) ligand 1</b>                                                       | <b>yes</b>                                       |
| <b>Cyp1b1</b>                                                                   | <b>cytochrome P450, family 1, subfamily b, polypeptide 1</b>                                   | <b>yes</b>                                       |
| Dpy19l3                                                                         | dpy-19-like 3 (C. elegans)                                                                     | no                                               |
| <b>Efnb2</b>                                                                    | <b>ephrin B2</b>                                                                               | <b>yes</b>                                       |
| <b>Fbn1</b>                                                                     | <b>fibrillin 1</b>                                                                             | <b>yes</b>                                       |
| <b>Fgfr1</b>                                                                    | <b>fibroblast growth factor receptor 1</b>                                                     | <b>yes</b>                                       |
| Figf                                                                            | c-fos induced growth factor                                                                    | no                                               |
| <b>Fkbp10</b>                                                                   | <b>FK506 binding protein 10</b>                                                                | <b>yes</b>                                       |
| <b>Fkbp14</b>                                                                   | <b>FK506 binding protein 14</b>                                                                | <b>yes</b>                                       |
| <b>Fstl1</b>                                                                    | <b>follicle-stimulating-like 1</b>                                                             | <b>yes</b>                                       |
| <b>Fzd1</b>                                                                     | <b>frizzled homolog 1 (Drosophila)</b>                                                         | <b>yes</b>                                       |
| Ggcx                                                                            | gamma-glutamyl carboxylase                                                                     | no                                               |
| <b>Gpc6</b>                                                                     | <b>glypican 6</b>                                                                              | <b>yes</b>                                       |
| <b>Gpr124</b>                                                                   | <b>G protein-coupled receptor 124</b>                                                          | <b>yes</b>                                       |
| Gpr153                                                                          | G protein-coupled receptor 153                                                                 | no                                               |
| <b>Gpr177</b>                                                                   | <b>G protein-coupled receptor 177</b>                                                          | <b>yes</b>                                       |
| Gpr180                                                                          | G protein-coupled receptor 180                                                                 | no                                               |
| Gpx7                                                                            | glutathione peroxidase 7                                                                       | no                                               |
| Grb10                                                                           | growth factor receptor bound protein 10                                                        | no                                               |
| Hhat                                                                            | hedgehog acyltransferase                                                                       | no                                               |
| Hic1                                                                            | hypermethylated in cancer 1                                                                    | no                                               |
| <b>Id3</b>                                                                      | <b>inhibitor of DNA binding 3</b>                                                              | <b>yes</b>                                       |
| <b>Il6st</b>                                                                    | <b>interleukin 6 signal transducer</b>                                                         | <b>yes</b>                                       |
| Irx3                                                                            | Iroquois related homeobox 3 (Drosophila)                                                       | no                                               |
| Kdelc2                                                                          | KDEL (Lys-Asp-Glu-Leu) containing 2                                                            | no                                               |
| Lepre1                                                                          | leprecan 1                                                                                     | no                                               |
| Lgals7                                                                          | lectin, galactose binding, soluble 7                                                           | no                                               |
| <b>Lix1l</b>                                                                    | <b>Lix1-like</b>                                                                               | <b>yes</b>                                       |
| Lox                                                                             | lysyl oxidase                                                                                  | no                                               |
| Map1lc3a                                                                        | microtubule-associated protein 1 light chain 3 alpha                                           | no                                               |
| <b>Mgp</b>                                                                      | <b>matrix Gla protein</b>                                                                      | <b>yes</b>                                       |
| Mmp2                                                                            | matrix metalloproteinase 2                                                                     | no                                               |
| Mrc2                                                                            | mannose receptor, C type 2                                                                     | no                                               |
| <b>Msx1</b>                                                                     | <b>homeo box, msh-like 1</b>                                                                   | <b>yes</b>                                       |
| Mxd4                                                                            | Max dimerization protein 4                                                                     | no                                               |
| <b>Mxra8</b>                                                                    | <b>matrix-remodelling associated 8</b>                                                         | <b>yes</b>                                       |
| Oat                                                                             | ornithine aminotransferase                                                                     | no                                               |
| Obs1                                                                            | obscurin-like 1                                                                                | no                                               |
| <b>Pcolce</b>                                                                   | <b>procollagen C-endopeptidase enhancer protein</b>                                            | <b>yes</b>                                       |
| <b>Pdgfrb</b>                                                                   | <b>platelet derived growth factor receptor, beta polypeptide</b>                               | <b>yes</b>                                       |
| <b>Pdzrn3</b>                                                                   | <b>PDZ domain containing RING finger 3</b>                                                     | <b>yes</b>                                       |
| <b>Pkd2</b>                                                                     | <b>polycystic kidney disease 2</b>                                                             | <b>yes</b>                                       |

|                 |                                                                               |            |
|-----------------|-------------------------------------------------------------------------------|------------|
| Plekhf1         | pleckstrin homology domain containing, family F (with FYVE domain) member 1   | no         |
| Plekhg4         | pleckstrin homology domain containing, family G (with RhoGef domain) member 4 | no         |
| <b>Pls3</b>     | <b>plastin 3 (T-isoform)</b>                                                  | <b>yes</b> |
| <b>Postn</b>    | <b>periostin, osteoblast specific factor</b>                                  | <b>yes</b> |
| <b>Ppap2a</b>   | <b>phosphatidic acid phosphatase 2a</b>                                       | <b>yes</b> |
| <b>Ppic</b>     | <b>peptidylprolyl isomerase C</b>                                             | <b>yes</b> |
| <b>Prelp</b>    | <b>proline arginine-rich end leucine-rich repeat</b>                          | <b>yes</b> |
| <b>Prkcdp</b>   | <b>protein kinase C, delta binding protein</b>                                | <b>yes</b> |
| <b>Prrx1</b>    | <b>paired related homeobox 1</b>                                              | <b>yes</b> |
| Rab40b          | Rab40b, member RAS oncogene family                                            | no         |
| <b>Rcn1</b>     | <b>reticulocalbin 1</b>                                                       | <b>yes</b> |
| Rcn3            | reticulocalbin 3, EF-hand calcium binding domain                              | no         |
| <b>Ror1</b>     | <b>receptor tyrosine kinase-like orphan receptor 1</b>                        | <b>yes</b> |
| Scarf2          | scavenger receptor class F, member 2                                          | no         |
| <b>Sdc2</b>     | <b>syndecan 2</b>                                                             | <b>yes</b> |
| Sec23a          | SEC23A ( <i>S. cerevisiae</i> )                                               | no         |
| <b>Serpinf1</b> | <b>serine (or cysteine) peptidase inhibitor, clade F, member 1</b>            | <b>yes</b> |
| <b>Serpinh1</b> | <b>serine (or cysteine) peptidase inhibitor, clade H, member 1</b>            | <b>yes</b> |
| <b>Sgce</b>     | <b>sarcoglycan, epsilon</b>                                                   | <b>yes</b> |
| Slc2a10         | solute carrier family 2 (facilitated glucose transporter), member 10          | no         |
| Slc35a2         | solute carrier family 35 (UDP-galactose transporter), member 2                | no         |
| <b>Smoc2</b>    | <b>SPARC related modular calcium binding 2</b>                                | <b>yes</b> |
| <b>Sorbs1</b>   | <b>sorbin and SH3 domain containing 1</b>                                     | <b>yes</b> |
| <b>Sparc</b>    | <b>secreted acidic cysteine rich glycoprotein</b>                             | <b>yes</b> |
| Spin4           | RIKEN cDNA 9630042H07 gene                                                    | no         |
| Svep1           | sushi, von Willebrand factor type A, EGF and pentraxin domain containing 1    | no         |
| <b>Synpo</b>    | <b>synaptopodin</b>                                                           | <b>yes</b> |
| Tbx15           | T-box 15                                                                      | no         |
| Tdrd3           | tudor domain containing 3                                                     | no         |
| <b>Tgfb1i1</b>  | <b>transforming growth factor beta 1 induced transcript 1</b>                 | <b>yes</b> |
| Tmem119         | transmembrane protein 119                                                     | no         |
| <b>Twist1</b>   | <b>twist gene homolog 1 (Drosophila)</b>                                      | <b>yes</b> |
| <b>Vasn</b>     | <b>vasorin</b>                                                                | <b>yes</b> |
| Zfp449          | zinc finger protein 449                                                       | no         |

97 **Total mesenchyme cluster genes**  
53 **Total shared in top 5% expressed by enriched splenic FDC**  
54.6 % shared

\*, Normalised expression data from Huber *et al.* (2005) *J. Immunol.* **174**: 5526-5536 (GSE2123) performed on Affymetrix mouse genome U74v2 expression arrays
