# Supplementary material
Source: PubMed Central journal article supplement (PMC3143359)
Supplement: imm0133-0482-SD4.pdf [file imm0133-0482-SD4.pdf]

**Supplementary Table 3:** Mesenchyme-specific cluster genes in the top 5% co-expressed by FDC-depleted splenocytes versus enriched splenic FDC in the study described by Huber *et al.* (2005)

| Annotated genes from mesenchyme-specific clusters 24, 25, 92, 93 and 112 |                                                                                                |                                                        |
|--------------------------------------------------------------------------|------------------------------------------------------------------------------------------------|--------------------------------------------------------|
| Gene symbol                                                              | Gene title                                                                                     | In top 5% genes expressed by FDC-depleted splenocytes* |
| Acta2                                                                    | actin, alpha 2, smooth muscle, aorta                                                           | no                                                     |
| Adamts12                                                                 | a disintegrin-like and metallopeptidase (reprolysin type) with thrombospondin type 1 motif, 12 | no                                                     |
| Ak1                                                                      | adenylate kinase 1                                                                             | no                                                     |
| Atoh8                                                                    | atonal homolog 8 (Drosophila)                                                                  | no                                                     |
| Bgn                                                                      | biglycan                                                                                       | no                                                     |
| Boc                                                                      | biregional cell adhesion molecule-related/down-regulated by oncogenes (Cdon) binding protein   | no                                                     |
| C1qtnf6                                                                  | C1q and tumor necrosis factor related protein 6                                                | no                                                     |
| Cald1                                                                    | caldesmon 1                                                                                    | no                                                     |
| Casp12                                                                   | caspase 12                                                                                     | no                                                     |
| Ccdc80                                                                   | coiled-coil domain containing 80                                                               | no                                                     |
| Ckap4                                                                    | cytoskeleton-associated protein 4                                                              | no                                                     |
| Cnn3                                                                     | calponin 3, acidic                                                                             | no                                                     |
| Col12a1                                                                  | procollagen, type XII, alpha 1                                                                 | no                                                     |
| Col1a1                                                                   | procollagen, type I, alpha 1                                                                   | no                                                     |
| Col1a2                                                                   | procollagen, type I, alpha 2                                                                   | no                                                     |
| Col3a1                                                                   | procollagen, type III, alpha 1                                                                 | no                                                     |
| Col5a2                                                                   | procollagen, type V, alpha 2                                                                   | no                                                     |
| Col6a1                                                                   | procollagen, type VI, alpha 1                                                                  | no                                                     |
| Col6a2                                                                   | procollagen, type VI, alpha 2                                                                  | no                                                     |
| Crtap                                                                    | cartilage associated protein                                                                   | no                                                     |
| Cthrc1                                                                   | collagen triple helix repeat containing 1                                                      | no                                                     |
| Cx3cl1                                                                   | chemokine (C-X3-C motif) ligand 1                                                              | no                                                     |
| Cyp1b1                                                                   | cytochrome P450, family 1, subfamily b, polypeptide 1                                          | no                                                     |
| Dpy19l3                                                                  | dpy-19-like 3 (C. elegans)                                                                     | no                                                     |
| Efnb2                                                                    | ephrin B2                                                                                      | no                                                     |
| Fbn1                                                                     | fibrillin 1                                                                                    | no                                                     |
| Fgfr1                                                                    | fibroblast growth factor receptor 1                                                            | no                                                     |
| Fgf                                                                      | c-fos induced growth factor                                                                    | no                                                     |
| Fkbp10                                                                   | FK506 binding protein 10                                                                       | no                                                     |
| Fkbp14                                                                   | FK506 binding protein 14                                                                       | no                                                     |
| Fstl1                                                                    | follicle-stimulating-like 1                                                                    | no                                                     |
| Fzd1                                                                     | frizzled homolog 1 (Drosophila)                                                                | no                                                     |
| Ggcx                                                                     | gamma-glutamyl carboxylase                                                                     | no                                                     |
| Gpc6                                                                     | glypican 6                                                                                     | no                                                     |
| Gpr124                                                                   | G protein-coupled receptor 124                                                                 | no                                                     |
| Gpr153                                                                   | G protein-coupled receptor 153                                                                 | no                                                     |
| Gpr177                                                                   | G protein-coupled receptor 177                                                                 | no                                                     |
| Gpr180                                                                   | G protein-coupled receptor 180                                                                 | no                                                     |
| Gpx7                                                                     | glutathione peroxidase 7                                                                       | no                                                     |
| Grb10                                                                    | growth factor receptor bound protein 10                                                        | no                                                     |
| Hhat                                                                     | hedgehog acyltransferase                                                                       | no                                                     |
| Hic1                                                                     | hypermethylated in cancer 1                                                                    | no                                                     |
| Id3                                                                      | inhibitor of DNA binding 3                                                                     | no                                                     |
| Il6st                                                                    | interleukin 6 signal transducer                                                                | no                                                     |
| Irx3                                                                     | Iroquois related homeobox 3 (Drosophila)                                                       | no                                                     |
| Kdelc2                                                                   | KDEL (Lys-Asp-Glu-Leu) containing 2                                                            | no                                                     |
| Lepre1                                                                   | leprecan 1                                                                                     | no                                                     |
| Lgals7                                                                   | lectin, galactose binding, soluble 7                                                           | no                                                     |
| Lix1l                                                                    | Lix1-like                                                                                      | no                                                     |
| Lox                                                                      | lysyl oxidase                                                                                  | no                                                     |
| Map1lc3a                                                                 | microtubule-associated protein 1 light chain 3 alpha                                           | no                                                     |
| Mgp                                                                      | matrix Gla protein                                                                             | no                                                     |
| Mmp2                                                                     | matrix metallopeptidase 2                                                                      | no                                                     |
| Mrc2                                                                     | mannose receptor, C type 2                                                                     | no                                                     |
| Msx1                                                                     | homeo box, msh-like 1                                                                          | no                                                     |
| Mxd4                                                                     | Max dimerization protein 4                                                                     | no                                                     |
| Mxra8                                                                    | matrix-remodelling associated 8                                                                | no                                                     |
| Oat                                                                      | ornithine aminotransferase                                                                     | no                                                     |
| Obsl1                                                                    | obscurin-like 1                                                                                | no                                                     |
| Pcolce                                                                   | procollagen C-endopeptidase enhancer protein                                                   | no                                                     |
| Pdgfrb                                                                   | platelet derived growth factor receptor, beta polypeptide                                      | no                                                     |
| Pdzrn3                                                                   | PDZ domain containing RING finger 3                                                            | no                                                     |
| Pkd2                                                                     | polycystic kidney disease 2                                                                    | no                                                     |
| Plekhf1                                                                  | pleckstrin homology domain containing, family F (with FYVE domain) member 1                    | no                                                     |
| Plekhg4                                                                  | pleckstrin homology domain containing, family G (with RhoGef domain) member 4                  | no                                                     |
| Pls3                                                                     | plastin 3 (T-isoform)                                                                          | no                                                     |

|          |                                                                            |    |
|----------|----------------------------------------------------------------------------|----|
| Postn    | periostin, osteoblast specific factor                                      | no |
| Ppap2a   | phosphatidic acid phosphatase 2a                                           | no |
| Ppic     | peptidylprolyl isomerase C                                                 | no |
| Prelp    | proline arginine-rich end leucine-rich repeat                              | no |
| Prkcdpb  | protein kinase C, delta binding protein                                    | no |
| Prrx1    | paired related homeobox 1                                                  | no |
| Rab40b   | Rab40b, member RAS oncogene family                                         | no |
| Rcn1     | reticulocalbin 1                                                           | no |
| Rcn3     | reticulocalbin 3, EF-hand calcium binding domain                           | no |
| Ror1     | receptor tyrosine kinase-like orphan receptor 1                            | no |
| Scarf2   | scavenger receptor class F, member 2                                       | no |
| Sdc2     | syndecan 2                                                                 | no |
| Sec23a   | SEC23A ( <i>S. cerevisiae</i> )                                            | no |
| Serpinf1 | serine (or cysteine) peptidase inhibitor, clade F, member 1                | no |
| Serpinh1 | serine (or cysteine) peptidase inhibitor, clade H, member 1                | no |
| Sgce     | sarcoglycan, epsilon                                                       | no |
| Slc2a10  | solute carrier family 2 (facilitated glucose transporter), member 10       | no |
| Slc35a2  | solute carrier family 35 (UDP-galactose transporter), member 2             | no |
| Smoc2    | SPARC related modular calcium binding 2                                    | no |
| Sorbs1   | sorbin and SH3 domain containing 1                                         | no |
| Sparc    | secreted acidic cysteine rich glycoprotein                                 | no |
| Spin4    | RIKEN cDNA 9630042H07 gene                                                 | no |
| Svep1    | sushi, von Willebrand factor type A, EGF and pentraxin domain containing 1 | no |
| Synpo    | synaptopodin                                                               | no |
| Tbx15    | T-box 15                                                                   | no |
| Tdrd3    | tudor domain containing 3                                                  | no |
| Tgfb1i1  | transforming growth factor beta 1 induced transcript 1                     | no |
| Tmem119  | transmembrane protein 119                                                  | no |
| Twist1   | twist gene homolog 1 ( <i>Drosophila</i> )                                 | no |
| Vasn     | vasorin                                                                    | no |
| Zfp449   | zinc finger protein 449                                                    | no |

97 **Total mesenchyme transcripts**

0 **Total shared**

0.0 % **shared**

\*, Normalised expression data from Huber *et al.* (2005) *J. Immunol.* **174**: 5526-5536 (GSE2123) performed on Affymetrix mouse genome U74v2 expression arrays
