# Supplementary material
Source: PubMed Central journal article supplement (PMC3143359)
Supplement: imm0133-0482-SD5.pdf [file imm0133-0482-SD5.pdf]

**Supplementary Table 4: Mesenchyme-specific genes within the top 5% genes expressed by human FDC (HK cells)**

| <b>Annotated genes from mesenchyme-specific clusters 24, 25, 92, 93 and 112</b> |                                                                                                |                                                          |
|---------------------------------------------------------------------------------|------------------------------------------------------------------------------------------------|----------------------------------------------------------|
| <b>Gene symbol (mouse)</b>                                                      | <b>Gene description</b>                                                                        | <b>In top 5% genes expressed by human FDC (HK cells)</b> |
| <b>Acta2</b>                                                                    | <b>actin, alpha 2, smooth muscle, aorta</b>                                                    | <b>yes</b>                                               |
| Adams12                                                                         | a disintegrin-like and metallopeptidase (reprolysin type) with thrombospondin type 1 motif, 12 | no                                                       |
| <b>Ak1</b>                                                                      | <b>adenylate kinase 1</b>                                                                      | <b>yes</b>                                               |
| <b>Ankrd25</b>                                                                  | <b>ankyrin repeat domain 25</b>                                                                | <b>yes</b>                                               |
| <b>Antxr1</b>                                                                   | <b>anthrax toxin receptor 1</b>                                                                | <b>yes</b>                                               |
| Atoh8                                                                           | atonal homolog 8 (Drosophila)                                                                  | no                                                       |
| <b>Bgn</b>                                                                      | <b>biglycan</b>                                                                                | <b>yes</b>                                               |
| C1qtnf6                                                                         | C1q and tumor necrosis factor related protein 6                                                | no                                                       |
| <b>Cald1</b>                                                                    | <b>caldesmon 1</b>                                                                             | <b>yes</b>                                               |
| Casp12                                                                          | caspace 12                                                                                     | no                                                       |
| <b>Ckap4</b>                                                                    | <b>cytoskeleton-associated protein 4</b>                                                       | <b>yes</b>                                               |
| <b>Cnn3</b>                                                                     | <b>calponin 3, acidic</b>                                                                      | <b>yes</b>                                               |
| <b>Col1a1</b>                                                                   | <b>procollagen, type I, alpha 1</b>                                                            | <b>yes</b>                                               |
| <b>Col1a2</b>                                                                   | <b>procollagen, type I, alpha 2</b>                                                            | <b>yes</b>                                               |
| <b>Col3a1</b>                                                                   | <b>procollagen, type III, alpha 1</b>                                                          | <b>yes</b>                                               |
| <b>Col5a2</b>                                                                   | <b>procollagen, type V, alpha 2</b>                                                            | <b>yes</b>                                               |
| <b>Col6a1</b>                                                                   | <b>procollagen, type VI, alpha 1</b>                                                           | <b>yes</b>                                               |
| <b>Col6a2</b>                                                                   | <b>procollagen, type VI, alpha 2</b>                                                           | <b>yes</b>                                               |
| <b>Col12a1</b>                                                                  | <b>procollagen, type XII, alpha 1</b>                                                          | <b>yes</b>                                               |
| <b>Copz2</b>                                                                    | <b>coatamer protein complex, subunit zeta 2</b>                                                | <b>yes</b>                                               |
| <b>Crtap</b>                                                                    | <b>cartilage associated protein</b>                                                            | <b>yes</b>                                               |
| <b>Cthrc1</b>                                                                   | <b>collagen triple helix repeat containing 1</b>                                               | <b>yes</b>                                               |
| Cyp1b1                                                                          | cytochrome P450, family 1, subfamily b, polypeptide 1                                          | no                                                       |
| <b>Edg2</b>                                                                     | <b>endothelial differentiation, lysophosphatidic acid G-protein-coupled receptor, 2</b>        | <b>yes</b>                                               |
| Efnb2                                                                           | ephrin B2                                                                                      | no                                                       |
| <b>Fbn1</b>                                                                     | <b>fibrillin 1</b>                                                                             | <b>yes</b>                                               |
| <b>Fgfr1</b>                                                                    | <b>fibroblast growth factor receptor 1</b>                                                     | <b>yes</b>                                               |
| Figf                                                                            | c-fos induced growth factor                                                                    | no                                                       |
| Fkbp10                                                                          | FK506 binding protein 10                                                                       | no                                                       |
| Fkbp14                                                                          | FK506 binding protein 14                                                                       | no                                                       |
| <b>Fstl1</b>                                                                    | <b>follicle-stimulating-like 1</b>                                                             | <b>yes</b>                                               |
| Fzd1                                                                            | frizzled homolog 1 (Drosophila)                                                                | no                                                       |
| Ggcx                                                                            | gamma-glutamyl carboxylase                                                                     | no                                                       |
| Gpc6                                                                            | glypican 6                                                                                     | no                                                       |
| Gpr124                                                                          | G protein-coupled receptor 124                                                                 | no                                                       |
| Gpr153                                                                          | G protein-coupled receptor 153                                                                 | no                                                       |
| Gpx7                                                                            | glutathione peroxidase 7                                                                       | no                                                       |
| Grb10                                                                           | growth factor receptor bound protein 10                                                        | no                                                       |
| Gulp1                                                                           | GULP, engulfment adaptor PTB domain containing 1                                               | no                                                       |
| Hhat                                                                            | hedgehog acyltransferase                                                                       | no                                                       |
| Hic1                                                                            | hypermethylated in cancer 1                                                                    | no                                                       |
| <b>Id3</b>                                                                      | <b>inhibitor of DNA binding 3</b>                                                              | <b>yes</b>                                               |
| <b>Il6st</b>                                                                    | <b>interleukin 6 signal transducer</b>                                                         | <b>yes</b>                                               |
| Irx3                                                                            | Iroquois related homeobox 3 (Drosophila)                                                       | no                                                       |
| <b>Kdelc2</b>                                                                   | <b>KDEL (Lys-Asp-Glu-Leu) containing 2</b>                                                     | <b>yes</b>                                               |
| Lepre1                                                                          | leprecan 1                                                                                     | no                                                       |
| Leprel2                                                                         | leprecan-like 2                                                                                | no                                                       |
| Lgals7                                                                          | lectin, galactose binding, soluble 7                                                           | no                                                       |
| Lima1                                                                           | LIM domain and actin binding 1                                                                 | no                                                       |
| Lix1l                                                                           | Lix1-like                                                                                      | no                                                       |
| <b>Lox</b>                                                                      | <b>lysyl oxidase</b>                                                                           | <b>yes</b>                                               |
| Lrig3                                                                           | leucine-rich repeats and immunoglobulin-like domains 3                                         | no                                                       |
| Map1lc3a                                                                        | microtubule-associated protein 1 light chain 3 alpha                                           | no                                                       |
| Mgp                                                                             | matrix Gla protein                                                                             | no                                                       |
| <b>Mmp2</b>                                                                     | <b>matrix metalloproteinase 2</b>                                                              | <b>yes</b>                                               |
| <b>Mrc2</b>                                                                     | <b>mannose receptor, C type 2</b>                                                              | <b>yes</b>                                               |
| Mrgprf                                                                          | MAS-related GPR, member F                                                                      | no                                                       |
| Msx1                                                                            | homeo box, msh-like 1                                                                          | no                                                       |
| Mxra8                                                                           | matrix-remodelling associated 8                                                                | no                                                       |
| <b>Oat</b>                                                                      | <b>ornithine aminotransferase</b>                                                              | <b>yes</b>                                               |
| <b>Pcolce</b>                                                                   | <b>procollagen C-endopeptidase enhancer protein</b>                                            | <b>yes</b>                                               |
| Pdgfrb                                                                          | platelet derived growth factor receptor, beta polypeptide                                      | no                                                       |
| Pkd2                                                                            | polycystic kidney disease 2                                                                    | no                                                       |
| <b>Pls3</b>                                                                     | <b>plastin 3 (T-isoform)</b>                                                                   | <b>yes</b>                                               |
| <b>Postn</b>                                                                    | <b>periostin, osteoblast specific factor</b>                                                   | <b>yes</b>                                               |
| <b>Ppap2a</b>                                                                   | <b>phosphatidic acid phosphatase 2a</b>                                                        | <b>yes</b>                                               |
| <b>Ppic</b>                                                                     | <b>peptidylprolyl isomerase C</b>                                                              | <b>yes</b>                                               |

|                 |                                                                      |            |
|-----------------|----------------------------------------------------------------------|------------|
| Prelp           | proline arginine-rich end leucine-rich repeat                        | no         |
| <b>Prkcdbp</b>  | <b>protein kinase C, delta binding protein</b>                       | <b>yes</b> |
| <b>Prrx1</b>    | <b>paired related homeobox 1</b>                                     | <b>yes</b> |
| <b>Qscn6</b>    | <b>quiescin Q6</b>                                                   | <b>yes</b> |
| Rab40b          | Rab40b, member RAS oncogene family                                   | no         |
| Rbms3           | RNA binding motif, single stranded interacting protein               | no         |
| <b>Rcn1</b>     | <b>reticulocalbin 1</b>                                              | <b>yes</b> |
| <b>Rcn3</b>     | <b>reticulocalbin 3, EF-hand calcium binding domain</b>              | <b>yes</b> |
| Ror1            | receptor tyrosine kinase-like orphan receptor 1                      | no         |
| Scarf2          | scavenger receptor class F, member 2                                 | no         |
| Sdc2            | syndecan 2                                                           | no         |
| Sec23a          | SEC23A ( <i>S. cerevisiae</i> )                                      | no         |
| <b>Serpinf1</b> | <b>serine (or cysteine) peptidase inhibitor, clade F, member 1</b>   | <b>yes</b> |
| Serpinh1        | serine (or cysteine) peptidase inhibitor, clade H, member 1          | no         |
| Sgce            | sarcoglycan, epsilon                                                 | no         |
| Slc2a10         | solute carrier family 2 (facilitated glucose transporter), member 10 | no         |
| Slc35a2         | solute carrier family 35 (UDP-galactose transporter), member 2       | no         |
| Smoc2           | SPARC related modular calcium binding 2                              | no         |
| Sorbs1          | sorbin and SH3 domain containing 1                                   | no         |
| <b>Sparc</b>    | <b>secreted acidic cysteine rich glycoprotein</b>                    | <b>yes</b> |
| Tdrd3           | tudor domain containing 3                                            | no         |
| <b>Tgfb1i1</b>  | <b>transforming growth factor beta 1 induced transcript 1</b>        | <b>yes</b> |
| <b>Twist1</b>   | <b>twist gene homolog 1 (<i>Drosophila</i>)</b>                      | <b>yes</b> |
| Zfp449          | zinc finger protein 449                                              | no         |

Total mesenchyme cluster genes on array 91  
Total shared in top 5% expressed by HK cells 43  
% Shared **47.3**
